# Supplementary material
Source: publisher site journal article supplement (https://www.dovepress.com/article/487780)
Supplement: Supplementary file 1 [file get_supplementary_file.php]

Supplementary table 1 Normality test

|  |  |  | Statistic | Std. Error | Z score |
| --- | --- | --- | --- | --- | --- |
| CD_RISC | health | Skewness | -0.414532447 | 0.219985824 | -1.88436 |
|  |  | Kurtosis | 0.247722679 | 0.436585143 | 0.56741 |
|  | migraine | Skewness | -0.015991508 | 0.21652032 | -0.07386 |
|  |  | Kurtosis | -0.839792776 | 0.429806699 | -1.95388 |
| PSS13 | health | Skewness | -0.228084409 | 0.219985824 | -1.03681 |
|  |  | Kurtosis | -0.070607544 | 0.436585143 | -0.16173 |
|  | migraine | Skewness | 0.016114324 | 0.21652032 | 0.074424 |
|  |  | Kurtosis | 0.188962448 | 0.429806699 | 0.439645 |
| Mental Component Summary | health | Skewness | -0.255252808 | 0.219985824 | -1.16031 |
|  |  | Kurtosis | -0.245242839 | 0.436585143 | -0.56173 |
|  | migraine | Skewness | -0.607912074 | 0.21652032 | -2.80764 |
|  |  | Kurtosis | -0.068232556 | 0.429806699 | -0.15875 |
| Physical Component Summary | health | Skewness | -0.541154224 | 0.219985824 | -2.45995 |
|  |  | Kurtosis | 0.177121556 | 0.436585143 | 0.405698 |
|  | migraine | Skewness | -0.159017793 | 0.21652032 | -0.73442 |
|  |  | Kurtosis | -0.232797733 | 0.429806699 | -0.54163 |
| Physical Functioning | health | Skewness | -1.184220994 | 0.219985824 | -5.38317 |
|  |  | Kurtosis | 0.740770131 | 0.436585143 | 1.696737 |
|  | migraine | Skewness | -0.401625209 | 0.21652032 | -1.85491 |
|  |  | Kurtosis | -0.96596539 | 0.429806699 | -2.24744 |
| General Health | health | Skewness | 0.417196877 | 0.219985824 | 1.896472 |
|  |  | Kurtosis | -0.980048104 | 0.436585143 | -2.2448 |
|  | migraine | Skewness | 1.045641132 | 0.21652032 | 4.829298 |
|  |  | Kurtosis | 1.141790456 | 0.429806699 | 2.656521 |
| Vitality | health | Skewness | -0.175750882 | 0.219985824 | -0.79892 |
|  |  | Kurtosis | -0.837179986 | 0.436585143 | -1.91756 |
|  | migraine | Skewness | -0.088115964 | 0.21652032 | -0.40696 |
|  |  | Kurtosis | -0.892296868 | 0.429806699 | -2.07604 |
| Social Functioning | health | Skewness | -0.789155426 | 0.219985824 | -3.5873 |
|  |  | Kurtosis | -0.359219028 | 0.436585143 | -0.82279 |
|  | migraine | Skewness | -0.362949689 | 0.21652032 | -1.67628 |
|  |  | Kurtosis | -0.9924261 | 0.429806699 | -2.30901 |
| Body Pain | health | Skewness | -0.730814386 | 0.219985824 | -3.3221 |
|  |  | Kurtosis | -0.084522737 | 0.436585143 | -0.1936 |
|  | migraine | Skewness | 0.103050993 | 0.21652032 | 0.475941 |
|  |  | Kurtosis | -0.351350436 | 0.429806699 | -0.81746 |
| Role Physical | health | Skewness | -0.916392095 | 0.219985824 | -4.16569 |
|  |  | Kurtosis | -0.251198305 | 0.436585143 | -0.57537 |
|  | migraine | Skewness | -0.373640269 | 0.21652032 | -1.72566 |
|  |  | Kurtosis | -0.886924999 | 0.429806699 | -2.06354 |
| Role Emotional | health | Skewness | -0.905746543 | 0.219985824 | -4.1173 |
|  |  | Kurtosis | 0.03430321 | 0.436585143 | 0.078572 |
|  | migraine | Skewness | -0.679517434 | 0.21652032 | -3.13835 |
|  |  | Kurtosis | -0.449152742 | 0.429806699 | -1.04501 |
| Mental Health | health | Skewness | -0.309200035 | 0.219985824 | -1.40555 |
|  |  | Kurtosis | -0.001393846 | 0.436585143 | -0.00319 |
|  | migraine | Skewness | -0.26629957 | 0.21652032 | -1.22991 |
|  |  | Kurtosis | -0.621695014 | 0.429806699 | -1.44645 |

z score<3.29 consider as normality
